# Supplementary material
Source: PubMed Central journal article supplement (PMC7897300)
Supplement: NIHMS1658354-supplement-2.pdf [file NIHMS1658354-supplement-2.pdf]

|                                   | Parameter                |        | Median | Mean   | Std. Dev | 95% CI |        | p value |
|-----------------------------------|--------------------------|--------|--------|--------|----------|--------|--------|---------|
| Rheobase                          | Spike amplitude (mV)     | Low    | 61.64  | 60.86  | 9.97     | 55.34  | 66.38  | 0.723   |
|                                   |                          | High   | 59.90  | 59.93  | 8.53     | 55.20  | 64.65  |         |
|                                   | AHP amplitude (mV)       | Low    | 27.98  | 29.22  | 7.19     | 25.24  | 33.21  | 0.941   |
|                                   |                          | High   | 28.30  | 29.05  | 6.75     | 25.31  | 32.79  |         |
|                                   | Mean rise slope (V/s)    | Low    | 152.90 | 150.20 | 23.35    | 137.30 | 163.10 | 0.719   |
|                                   |                          | High   | 149.60 | 147.40 | 29.14    | 131.30 | 163.60 |         |
|                                   | Mean decay slope (V/s) ^ | Low    | 67.98  | 66.00  | 11.20    | 59.80  | 72.20  | 0.679   |
|                                   |                          | High   | 67.10  | 65.67  | 7.42     | 61.56  | 69.78  |         |
|                                   | Half width (ms) ^        | Low    | 0.79   | 0.78   | 0.05     | 0.75   | 0.81   | 0.894   |
| High                              |                          | 0.78   | 0.79   | 0.06   | 0.75     | 0.83   |        |         |
| Maximum rise slope (V/s)          | Low                      | 328.70 | 330.30 | 47.23  | 304.20   | 356.50 | 0.935  |         |
|                                   | High                     | 329.10 | 329.30 | 49.84  | 301.70   | 356.90 |        |         |
| Maximum decay slope (V/s) ^       | Low                      | 91.06  | 89.55  | 13.71  | 81.95    | 97.14  | 0.847  |         |
|                                   | High                     | 90.73  | 90.42  | 11.56  | 84.02    | 96.83  |        |         |
| Max rise/Max decay                | Low                      | 3.61   | 3.72   | 0.38   | 3.51     | 3.93   | 0.775  |         |
|                                   | High                     | 3.55   | 3.67   | 0.50   | 3.39     | 3.95   |        |         |
| Latency (ms) ^                    | Low                      | 14.46  | 16.01  | 7.68   | 11.76    | 20.26  | 0.169  |         |
|                                   | High                     | 10.47  | 12.59  | 6.08   | 9.22     | 15.95  |        |         |
| 5 spikes                          | Spike amplitude (mV)     | Low    | 55.56  | 57.70  | 8.61     | 52.93  | 62.47  | 0.678   |
|                                   |                          | High   | 57.63  | 58.77  | 8.35     | 54.15  | 63.40  |         |
|                                   | AHP amplitude (mV)       | Low    | 29.78  | 30.34  | 6.56     | 26.71  | 33.97  | 0.680   |
|                                   |                          | High   | 29.36  | 29.35  | 6.13     | 25.95  | 32.74  |         |
|                                   | Mean rise slope (V/s)    | Low    | 138.90 | 143.20 | 23.89    | 130.00 | 156.50 | 0.895   |
|                                   |                          | High   | 151.80 | 142.20 | 26.00    | 127.80 | 156.60 |         |
|                                   | Mean decay slope (V/s)   | Low    | 63.94  | 60.20  | 12.03    | 53.53  | 66.86  | 0.804   |
|                                   |                          | High   | 59.67  | 59.48  | 8.10     | 55.00  | 63.96  |         |
|                                   | Half width (ms)          | Low    | 0.81   | 0.82   | 0.08     | 0.77   | 0.86   | 0.797   |
| High                              |                          | 0.82   | 0.82   | 0.09   | 0.77     | 0.87   |        |         |
| Maximum rise slope (V/s)          | Low                      | 317.20 | 314.30 | 52.78  | 285.00   | 343.50 | 0.835  |         |
|                                   | High                     | 322.50 | 317.40 | 46.01  | 291.90   | 342.80 |        |         |
| Maximum decay slope (V/s) ^       | Low                      | 89.42  | 84.57  | 15.88  | 75.78    | 93.37  | 0.978  |         |
|                                   | High                     | 88.76  | 84.35  | 12.05  | 77.68    | 91.03  |        |         |
| Max rise/Max decay                | Low                      | 3.83   | 3.77   | 0.58   | 3.45     | 4.10   | 0.891  |         |
|                                   | High                     | 3.80   | 3.80   | 0.52   | 3.51     | 4.09   |        |         |
| Latency (ms)                      | Low                      | 6.95   | 6.97   | 2.25   | 5.72     | 8.22   | 0.830  |         |
|                                   | High                     | 7.25   | 7.15   | 2.29   | 5.88     | 8.41   |        |         |
| Input resistance (mΩ) ^           | Low                      | 161.80 | 165.30 | 46.58  | 139.50   | 191.10 | 0.079  |         |
|                                   | High                     | 195.00 | 199.20 | 55.20  | 168.60   | 229.70 |        |         |
| Capacitance (pF) ^                | Low                      | 75.59  | 78.25  | 11.56  | 71.85    | 84.65  | 0.083  |         |
|                                   | High                     | 70.41  | 69.66  | 13.40  | 62.24    | 77.08  |        |         |
| Resting membrane potential (mV)   | Low                      | -66.70 | -66.86 | 4.14   | -69.15   | -64.57 | 0.572  |         |
|                                   | High                     | -67.45 | -67.40 | 3.58   | -69.39   | -65.42 |        |         |
| Action potential threshold (mV) ^ | Low                      | -30.85 | -31.47 | 2.82   | -33.03   | -29.91 | 0.208  |         |
|                                   | High                     | -32.83 | -33.14 | 4.93   | -35.87   | -30.41 |        |         |
| Sag percentage ^                  | Low                      | 94.04  | 90.31  | 9.61   | 84.99    | 95.63  | 0.252  |         |
|                                   | High                     | 94.67  | 93.73  | 4.04   | 91.49    | 95.97  |        |         |

p values calculated via paired t-test except ^, which were calculated via Wilcoxon Signed Rank Sum test

**Table S1: Additional electrophysiological properties of high and low activity neurons. Related to Figure 5.** Values labeled “rheobase” are calculated for the first spike at rheobase, values labeled “5 spikes” are calculated for the first spike for the smallest current step to produce at least 5 action potentials. Passive properties are measured in voltage clamp with a -5mV voltage step.
